# Supplementary material for: Tuning electronic structure for enhanced photocatalytic performance: theoretical and experimental investigation of CuM1−xM′xO2 (M, M′ = B, Al, Ga, In) solid solutions
Source: Royal Society of Chemistry journal article supplement (doi:10.1039/d3dt02670a), 2023-01-01
Supplement: d3dt02670a1.pdf [file d3dt02670a1.pdf]

## Supplementary Information

for

### Tuning Electronic Structure for Enhanced Photocatalytic Efficiency:

### Theoretical and Experimental Investigation of

### $\text{CuM}_{1-x}\text{M}'_x\text{O}_2$ (M, M'=B, Al, Ga, In) Solid Solutions

Xian-Lan Chen<sup>1,3,#</sup>, Bao-Feng Shan<sup>1,#</sup>, Zong-Yan Zhao<sup>1,\*</sup>, Jin Zhang,<sup>2</sup> Qing-Ju Liu,<sup>2,\*</sup>

<sup>1</sup> Faculty of Materials Science and Engineering, Kunming University of Science and Technology,  
Kunming 650093, P. R. China

<sup>2</sup> Yunnan Key Laboratory for Micro/Nano Materials & Technology, School of Materials and  
Energy, Yunnan University, 650091 Kunming, P. R. China

<sup>3</sup> School of Chemistry and Resources Engineering, Honghe University, Mengzi 661199, P. R.  
China

# The authors contribute equally.

\* Corresponding author, E-mail: zzy@kust.edu.cn, qjliu@ynu.edu.cn

#### Thermodynamic stability

To schematize the thermodynamic solubility limit of  $\text{CuM}_{1-x}\text{M}'_x\text{O}_2$ , we compared their enthalpy of mixing ( $\Delta H_{\text{mix}}$ ) and the configurational entropy ( $\Delta S_{\text{mix}}$ ),  $\Delta H_{\text{mix}}$  is defined as:

$$\Delta H_{\text{mix}}[\text{CuM}_{1-x}\text{M}'_x\text{O}_2] = E(\text{CuM}_{1-x}\text{M}'_x\text{O}_2) - xE(\text{CuM}'\text{O}_2) - (1-x)E(\text{CuMO}_2)$$

where  $E(\text{CuM}_{1-x}\text{M}'_x\text{O}_2)$  is the total energy of  $\text{CuM}_{1-x}\text{M}'_x\text{O}_2$  and  $E(\text{CuM}'\text{O}_2)$  and  $E(\text{CuMO}_2)$  are the total energies of ground states of  $\text{CuM}'\text{O}_2$  and  $\text{CuMO}_2$ .

$\Delta H_{\text{mix}}$  of  $\text{CuAl}_{1-x}\text{Ga}_x\text{O}_2$  solid solutions can be reliably represented by a regular solution model, which has a symmetry of  $x=0.5$ . To capture the asymmetry of  $\Delta H_{\text{mix}}$  with respect to composition of  $\text{CuAl}_{1-x}\text{B}_x\text{O}_2$  ( $0 \leq x \leq 0.417$ ),  $\text{CuGa}_{1-x}\text{B}_x\text{O}_2$  ( $0 \leq x \leq 0.167$ ),  $\text{CuIn}_{1-x}\text{B}_x\text{O}_2$  ( $0 \leq x \leq 0.167$ ),  $\text{CuAl}_{1-x}\text{In}_x\text{O}_2$  and  $\text{CuGa}_{1-x}\text{In}_x\text{O}_2$ , a sub-regular solution model was used. The regular solution model and sub-regular solution model can be represented mathematically by the following equation:

$$\Delta H_{\text{mix}} = x(1-x)*\Omega(x)$$

$$\Delta H_{\text{mix}} = x(1-x)*[\Omega_1(1-x)+ \Omega_2x]$$

where x is the molar concentration,  $\Omega$  is the interaction parameter.

$$\Omega(x,0.0 \text{ K}) = \Delta H_{\text{mix}}(x,0.0 \text{ K})/[x(1-x)]$$

The entropy of a solid solution is a sum of the configurational entropy ( $\Delta S_{\text{mix}}$ ) and the vibrations entropy. The vibrational entropy is negligible compared to  $\Delta S_{\text{mix}}$ ,  $\Delta S_{\text{mix}}$  has a simple functional form.

$$\Delta S_{\text{mix}} = -k_B[x\ln x+(1-x)\ln(1-x)], k_B \text{ is a Boltzmann constant.}$$

The stability of solid solution is determined by the Gibbs-free energy of mixing ( $\Delta G_{\text{mix}}$ ), which includes not only  $\Delta H_{\text{mix}}$  but also the contribution of  $\Delta S_{\text{mix}}$  and temperature, which is given by:

$$\Delta G_{\text{mix}} = \Delta H_{\text{mix}} - T\Delta S_{\text{mix}} = (1-x)x* \Omega + k_B T[(1-x)\ln(1-x) + x\ln x]$$

where,  $\Delta S_{\text{mix}}$  is positive and  $-T\Delta S_{\text{mix}}$  is negative, indicating  $-T\Delta S_{\text{mix}}$  has stabilizing effect. Moreover, from  $\Delta G_{\text{mix}}$ , one obtains the solubility limits for binodal and spinodal decomposition, and the critical temperature as shown in **Figure 2b**.

### The calculation of lattice mismatch

The lattice mismatch,  $\Delta a/a$ , and  $\Delta c/c$  between  $\text{CuMO}_2$  and  $\text{CuM}'_x\text{O}_2$ , can be calculated by the following equation:

$$\frac{\Delta a}{a} = \frac{|a_{\text{CuMO}_2} - a_{\text{CuM}'_x\text{O}_2}|}{a_{\text{CuMO}_2}}$$

$$\frac{\Delta c}{c} = \frac{|c_{\text{CuMO}_2} - c_{\text{CuM}'_x\text{O}_2}|}{c_{\text{CuMO}_2}}$$

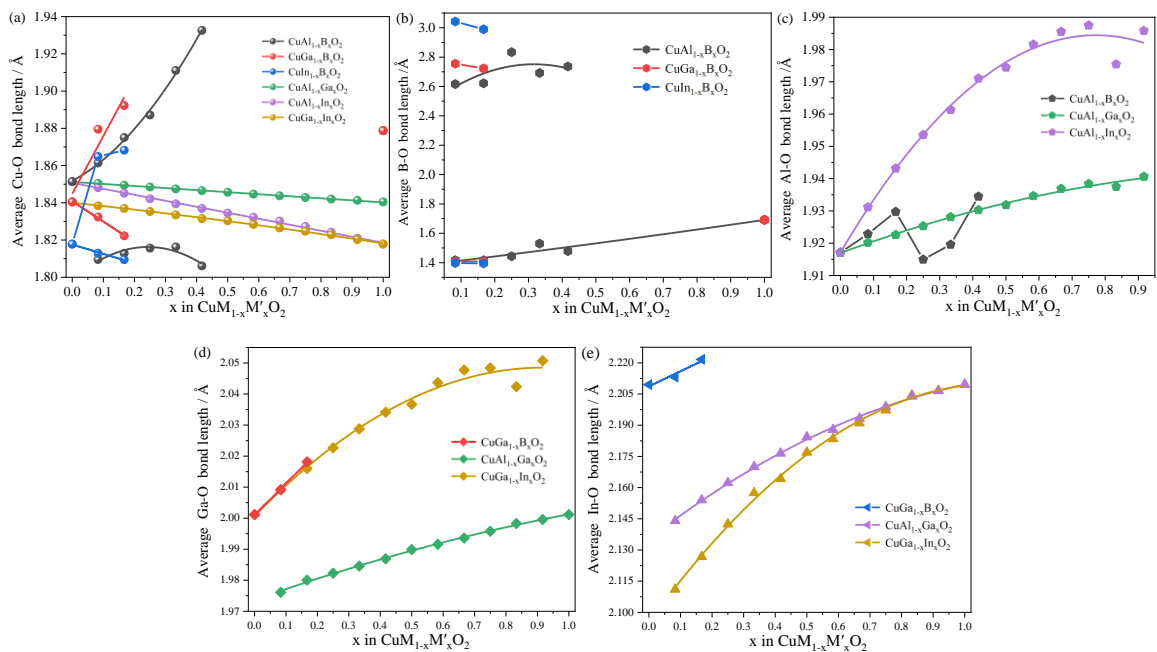

**Figure S1.** Average (a) Cu-O, (b) Al-O, (c) B-O, (d) Ga-O and (e) In-O bond lengths of  $\text{CuM}_{1-x}\text{M}'_x\text{O}_2$  solid solutions as a function of content  $x$ .

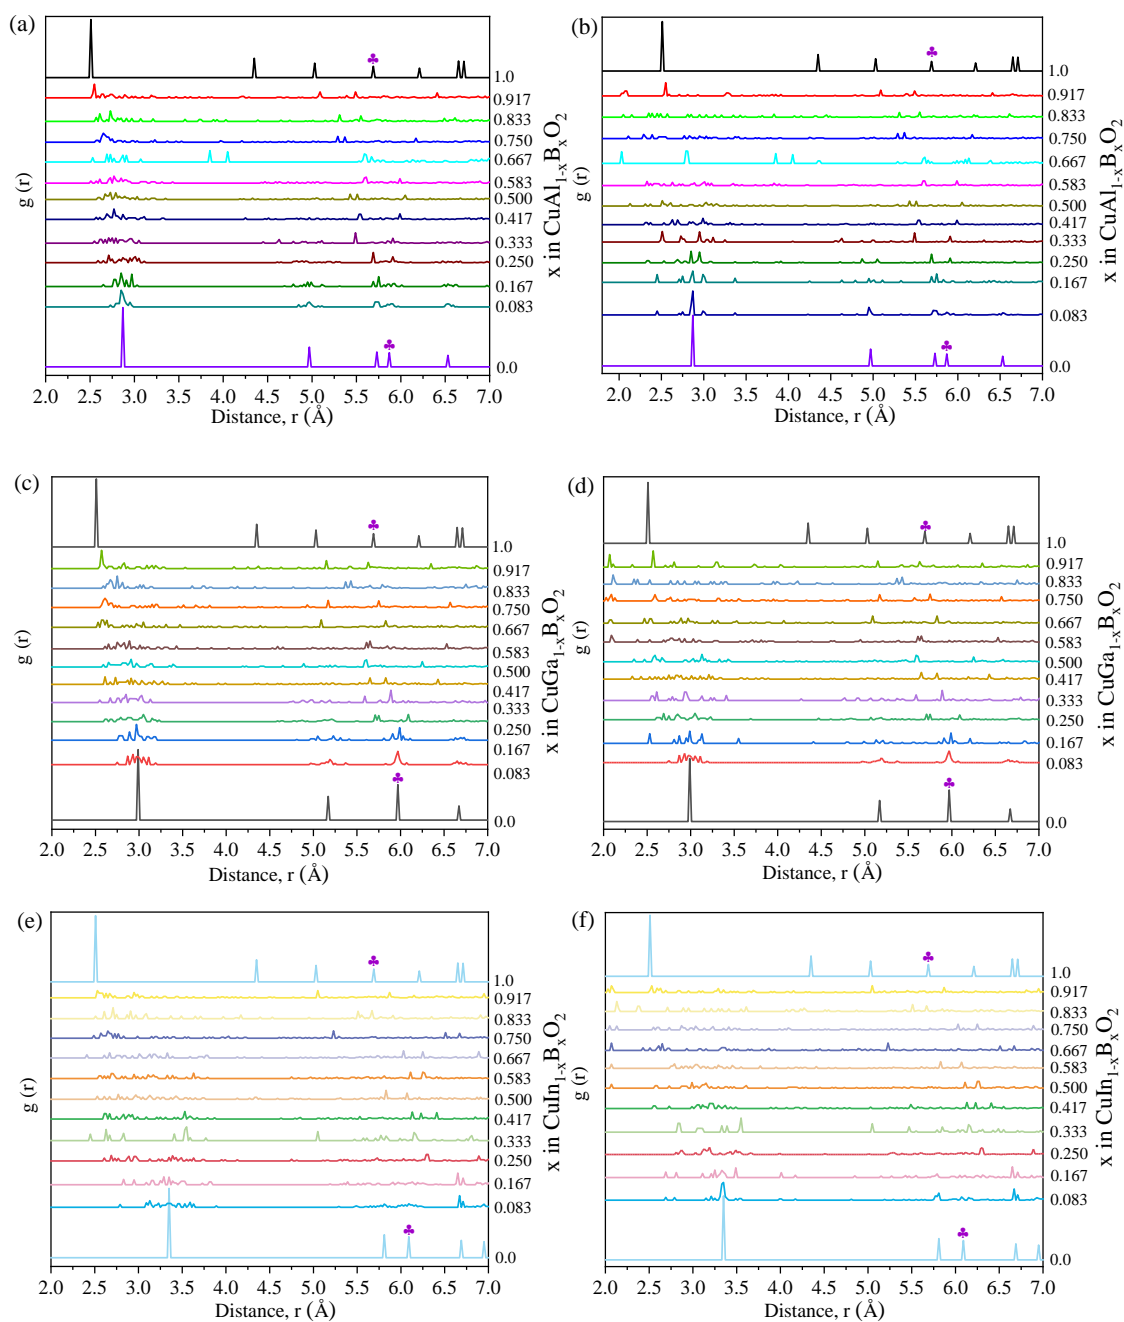

**Figure S2.** The partial radial distribution functions (a, c, e) Cu-Cu and (b, d, f) M-M average nearest neighbor occurrence vs distance for  $\text{CuM}_{1-x}\text{B}_x\text{O}_2$  compounds, the corresponding RDF peaks of Cu-Cu and M-M in the nearest interlayer are marked with clubs.

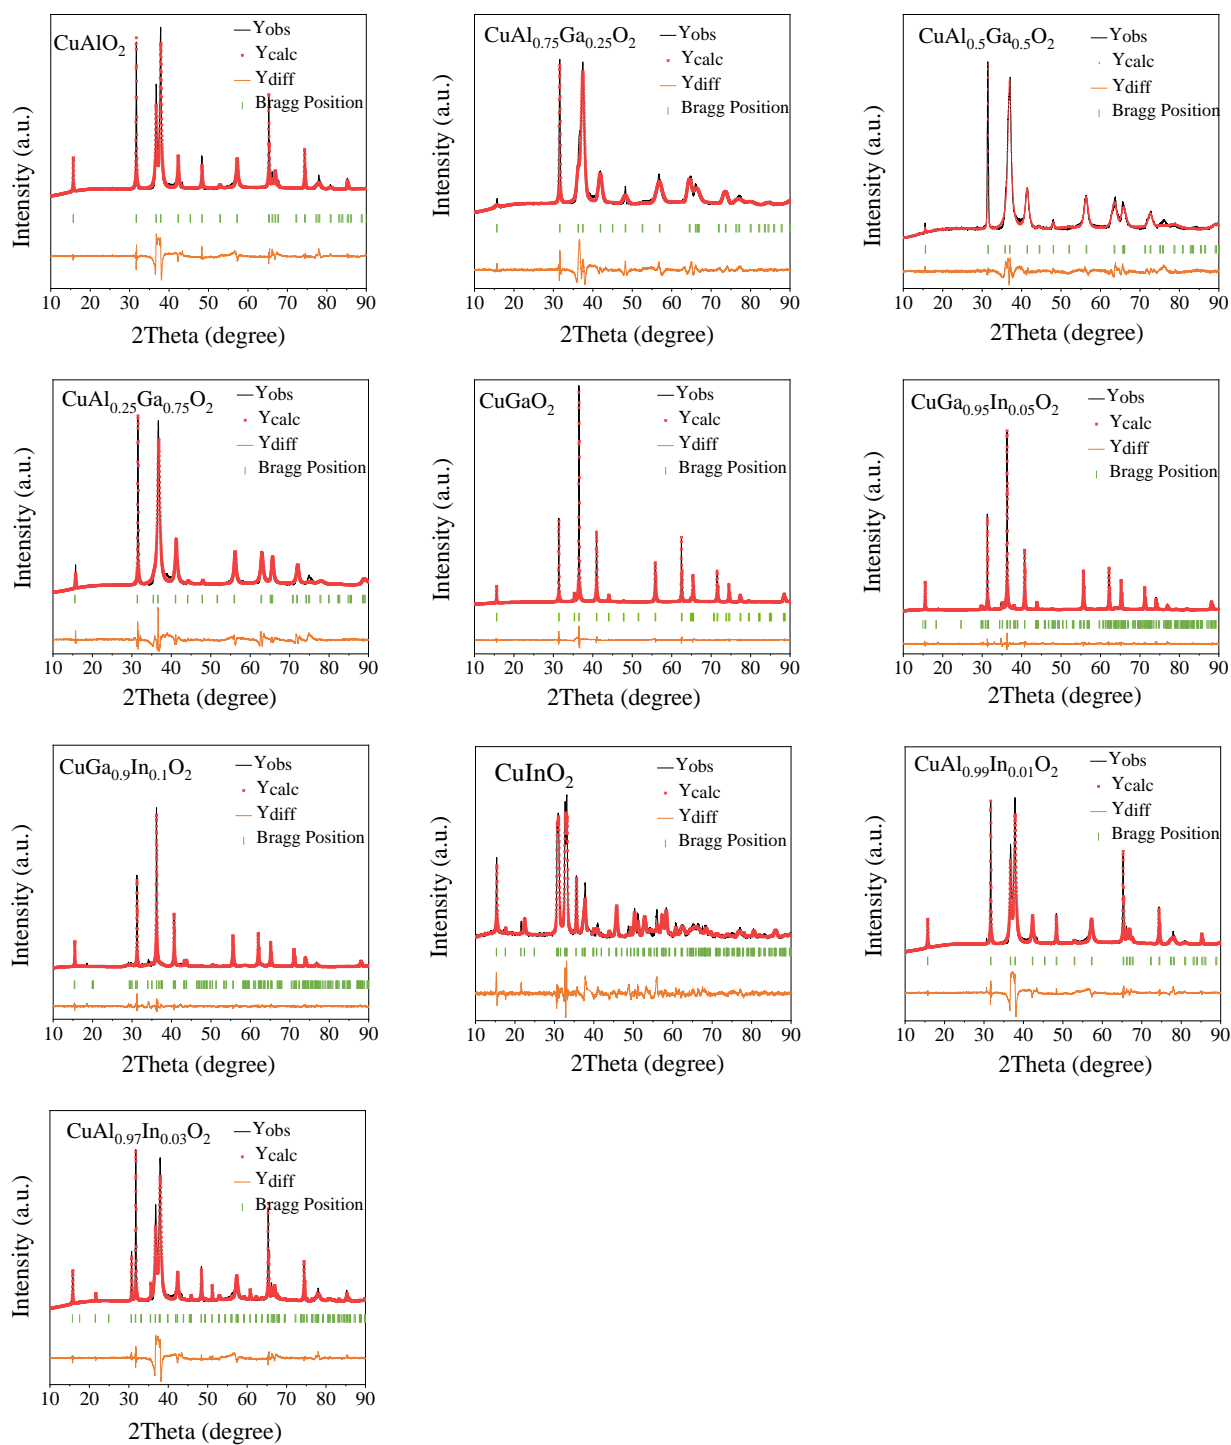

**Figure S3.** Powder X-ray diffraction and Rietveld plots of  $\text{CuAl}_{1-x}\text{Ga}_x\text{O}_2$ ,  $\text{CuGa}_{1-x}\text{In}_x\text{O}_2$  and  $\text{CuAl}_{1-x}\text{In}_x\text{O}_2$  samples.

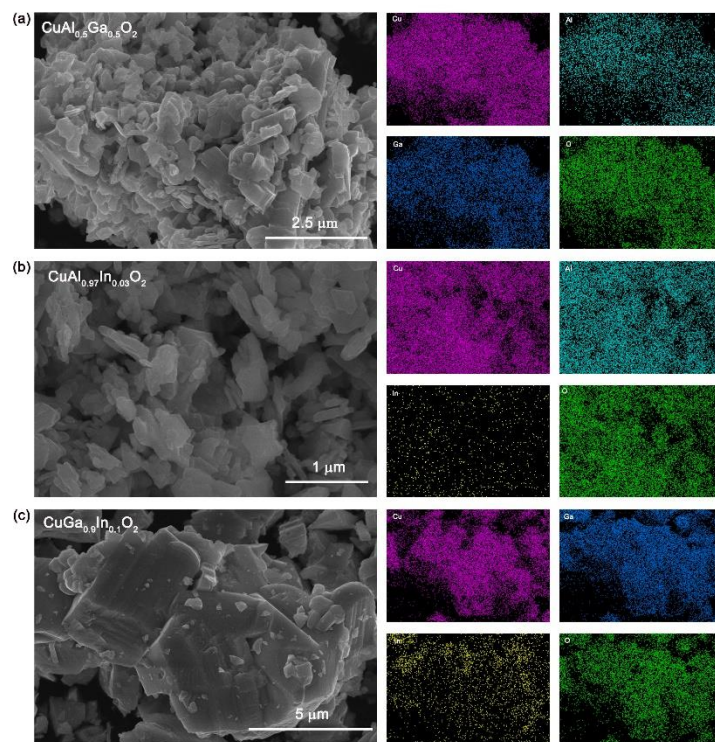

**Figure S4.** The SEM images and EDS element mappings of (a)  $\text{CuAl}_{0.5}\text{Ga}_{0.5}\text{O}_2$ , (b)  $\text{CuAl}_{0.97}\text{In}_{0.03}\text{O}_2$ , (c)  $\text{CuGa}_{0.9}\text{In}_{0.1}\text{O}_2$  samples.

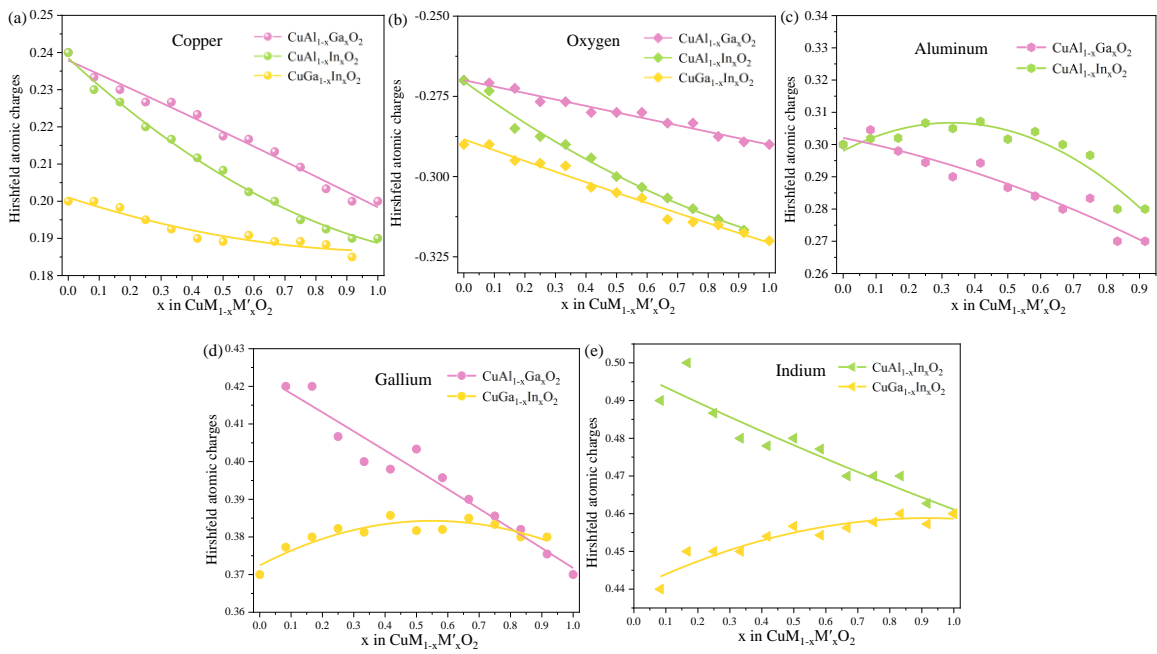

**Figure S5.** Average Hirshfeld charge Cu, O, Al, Ga and In atoms in  $\text{CuM}_{1-x}\text{M}'_x\text{O}_2$  solid solutions.

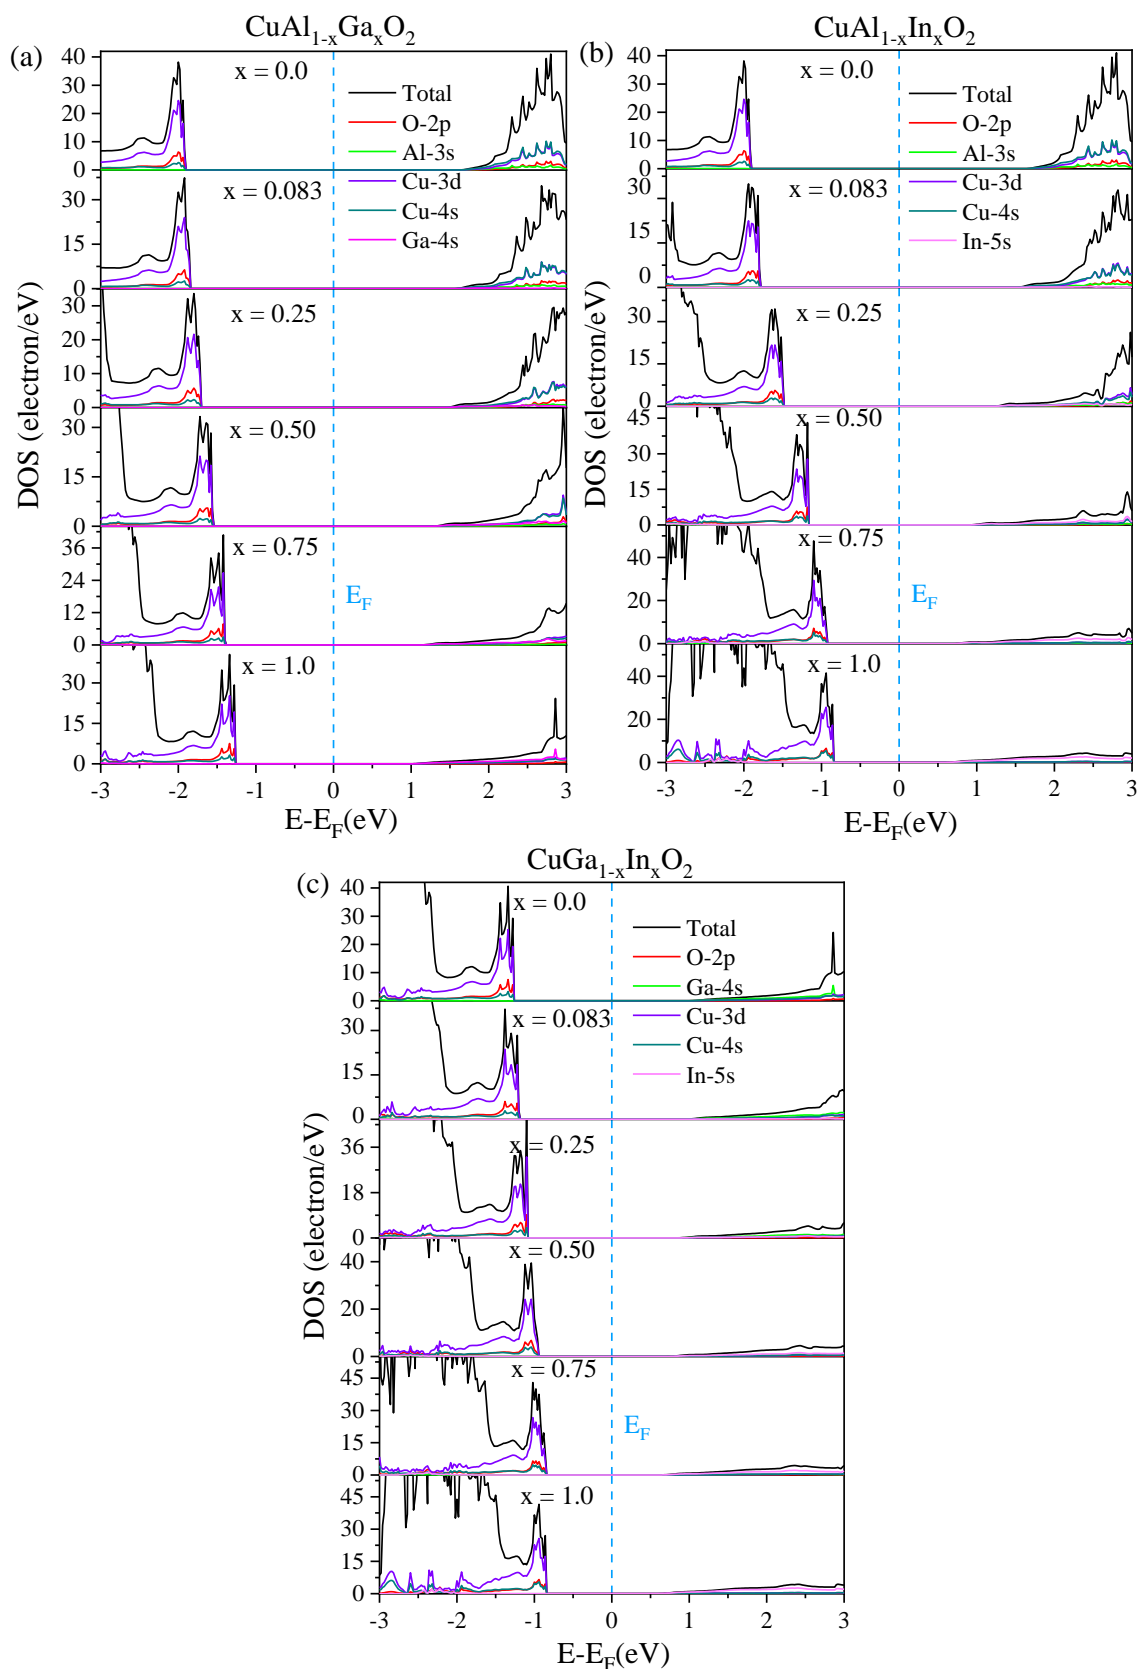

**Figure S6.** Projected density of states of  $\text{CuAl}_{1-x}\text{Ga}_x\text{O}_2$ ,  $\text{CuGa}_{1-x}\text{In}_x\text{O}_2$  and  $\text{CuAl}_{1-x}\text{In}_x\text{O}_2$  solid solutions as a function of content  $x$ .



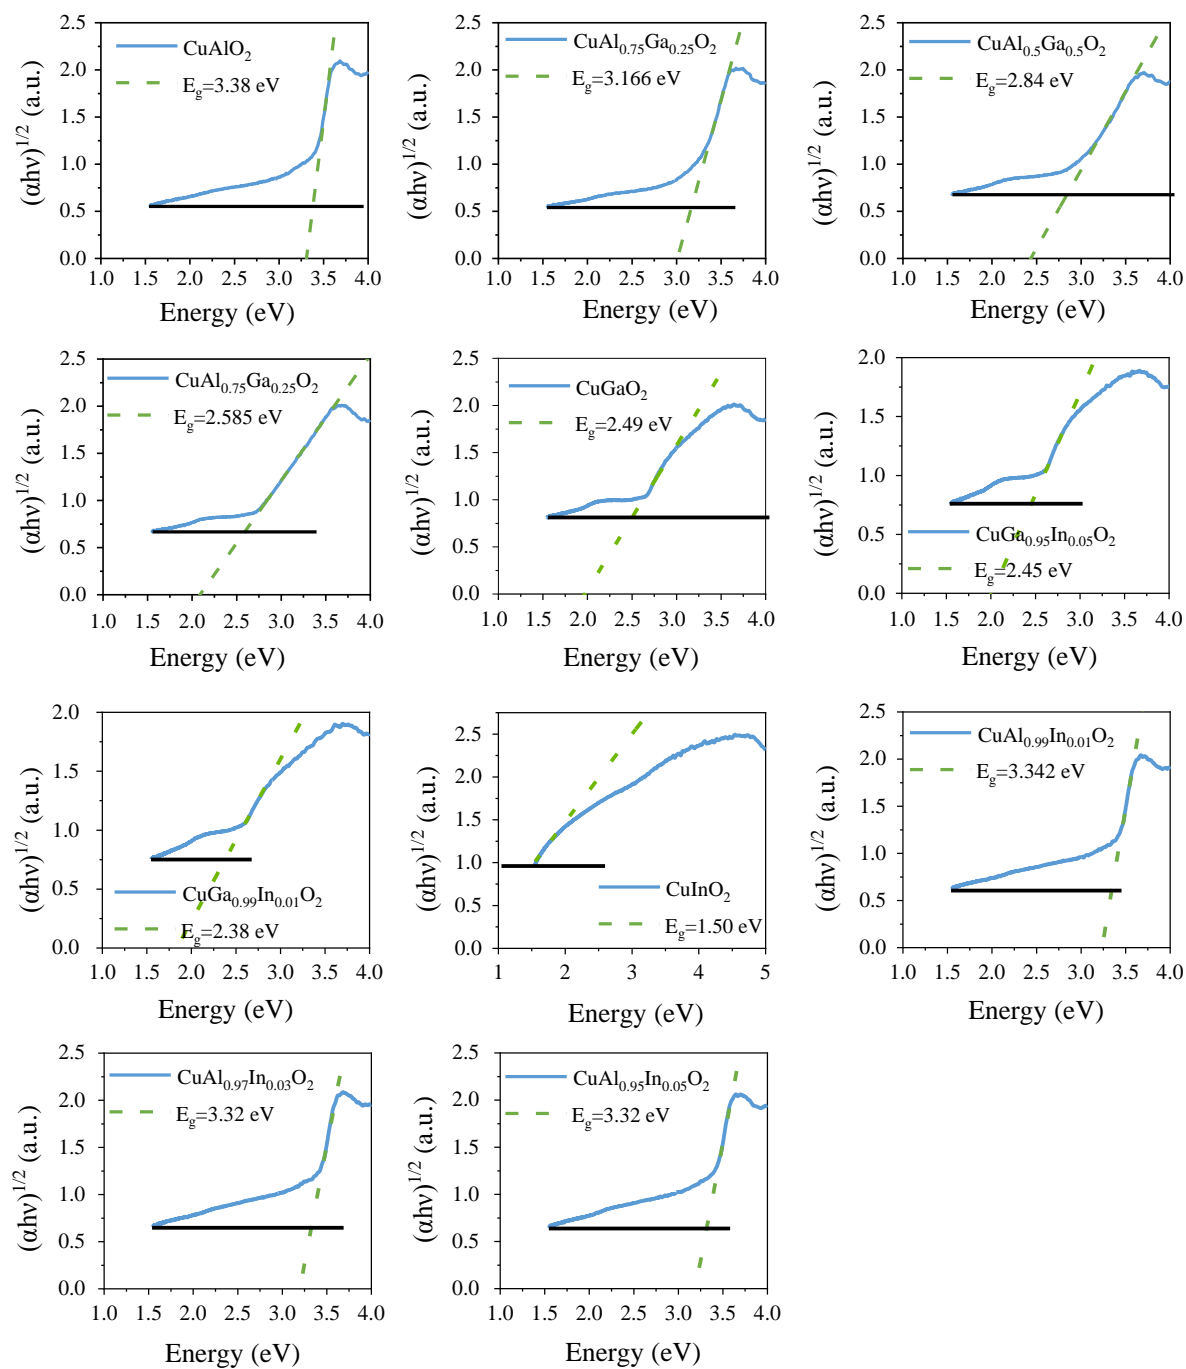

**Figure S7.** Optical band gaps of  $\text{CuAl}_{1-x}\text{Ga}_x\text{O}_2$ ,  $\text{CuGa}_{1-x}\text{In}_x\text{O}_2$  and  $\text{CuAl}_{1-x}\text{In}_x\text{O}_2$  samples were estimated by the Tauc plot method.

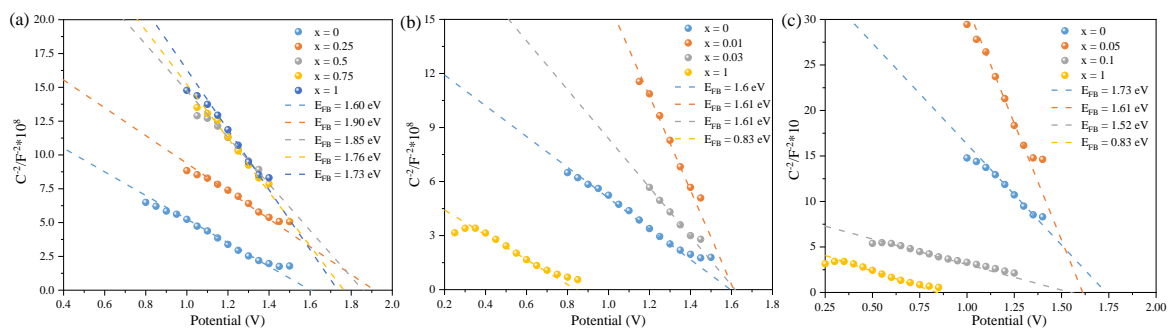

**Figure S8.** Mott–Schottky plots of  $\text{CuAl}_{1-x}\text{Ga}_x\text{O}_2$  ( $x=0, 0.25, 0.5, 0.75, 1$ ),  $\text{CuAl}_{1-x}\text{In}_x\text{O}_2$  ( $x=0, 0.01, 0.03, 1$ ) and  $\text{CuGa}_{1-x}\text{In}_x\text{O}_2$  ( $x=0, 0.05, 0.1, 1$ ) in aqueous  $\text{Na}_2\text{SO}_4$  solution.

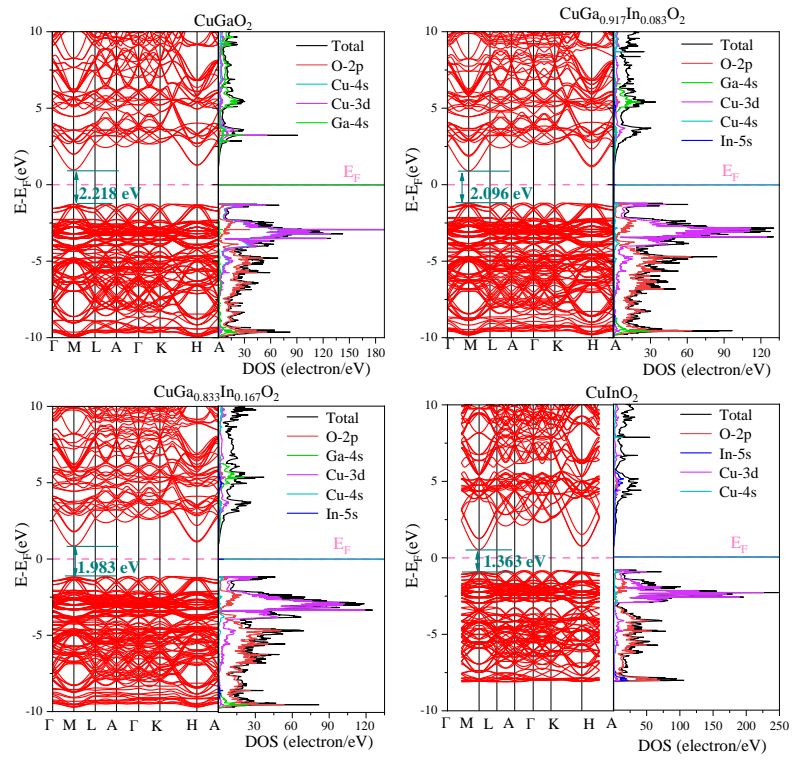

**Figure S9.** Band structure and the corresponding density of states of  $\text{CuGa}_{1-x}\text{In}_x\text{O}_2$  solid solutions.

**Table S1** The calculated lattice constants of CuBO<sub>2</sub>, CuAlO<sub>2</sub>, CuGaO<sub>2</sub> and CuInO<sub>2</sub>.

|                    | This work                | Computational reference value                                      |                                                                                                            | Experimental value/Å                                                 |
|--------------------|--------------------------|--------------------------------------------------------------------|------------------------------------------------------------------------------------------------------------|----------------------------------------------------------------------|
|                    | Lattice constants /Å     | Lattice constants /Å                                               | Computational method                                                                                       |                                                                      |
| CuBO <sub>2</sub>  | a=b=2.5117,<br>c=16.5031 | a=b=2.512, c=16.504 <sup>29</sup><br>a=b=2.6, c=16.6 <sup>30</sup> | GGA- PBEsol<br>PBE-GGA                                                                                     | a=b=2.53, c=16.58 (Pulsed laser deposition technique <sup>35</sup> ) |
|                    | CuAlO <sub>2</sub>       | a=b=2.8659,<br>c=16.9179                                           | a=b=2.861, c=16.978 <sup>31</sup><br>a=b=2.89, c=17.0 <sup>30</sup>                                        | WIEN97<br>PBE-GGA                                                    |
| CuGaO <sub>2</sub> |                          | a=b=2.9864,<br>c=17.1373                                           | a=b=2.9770, c=17.1710 <sup>32</sup><br>a=b=2.963, c=17.172 <sup>33</sup>                                   | TB-LMTO<br>LAPW                                                      |
|                    | CuInO <sub>2</sub>       | a=b=3.3488,<br>c=17.3237                                           | a=b=3.34, c=17.5 <sup>30</sup><br>a=b=3.359, c=17.529 <sup>34</sup><br>a=b=3.2920, c=17.3880 <sup>33</sup> | PBE-GGA<br>GGA-PBE<br>TB-LMTO                                        |

**Table S2.** Rietveld refinement results of XRD pattern for all compositions of CuAl<sub>1-x</sub>Ga<sub>x</sub>O<sub>2</sub>, CuGa<sub>1-x</sub>In<sub>x</sub>O<sub>2</sub> and CuAl<sub>1-x</sub>In<sub>x</sub>O<sub>2</sub> samples.

| Material                                               | Lattice parameter |         |                     |              |                     |
|--------------------------------------------------------|-------------------|---------|---------------------|--------------|---------------------|
|                                                        | a, b (Å)          | c (Å)   | $\alpha, \beta$ (°) | $\gamma$ (°) | V (Å <sup>3</sup> ) |
| CuAlO <sub>2</sub>                                     | 2.8578            | 16.9288 | 90.0                | 120.0        | 119.8725            |
| CuAl <sub>0.75</sub> Ga <sub>0.25</sub> O <sub>2</sub> | 2.8883            | 16.9688 | 90.0                | 120.0        | 122.5952            |
| CuAl <sub>0.5</sub> Ga <sub>0.5</sub> O <sub>2</sub>   | 2.9305            | 17.0566 | 90.0                | 120.0        | 126.8562            |
| CuAl <sub>0.25</sub> Ga <sub>0.75</sub> O <sub>2</sub> | 2.9616            | 17.1356 | 90.0                | 120.0        | 130.1631            |
| CuGaO <sub>2</sub>                                     | 2.9766            | 17.1632 | 90.0                | 120.0        | 131.6990            |
| CuAl <sub>0.99</sub> In <sub>0.01</sub> O <sub>2</sub> | 2.8665            | 16.9384 | 90.0                | 120.0        | 119.6908            |
| CuAl <sub>0.97</sub> In <sub>0.03</sub> O <sub>2</sub> | 2.8783            | 16.9482 | 90.0                | 120.0        | 119.9165            |
| CuInO <sub>2</sub>                                     | 3.3215            | 17.4000 | 90.0                | 120.0        | 166.2350            |
| CuGa <sub>0.95</sub> In <sub>0.05</sub> O <sub>2</sub> | 2.9894            | 17.1701 | 90.0                | 120.0        | 132.9590            |
| CuGa <sub>0.9</sub> In <sub>0.1</sub> O <sub>2</sub>   | 2.9923            | 17.1724 | 90.0                | 120.0        | 133.1642            |
| CuGa <sub>0.85</sub> In <sub>0.15</sub> O <sub>2</sub> | 2.9919            | 17.1767 | 90.0                | 120.0        | 133.1579            |

Table S3. The atomic percentage of different cations extracted from SEM-EDS for  $\text{CuAl}_{0.5}\text{Ga}_{0.5}\text{O}_2$ ,  $\text{CuAl}_{0.97}\text{In}_{0.03}\text{O}_2$  and  $\text{CuGa}_{0.9}\text{In}_{0.1}\text{O}_2$  samples.

| Material                                       | Atomic concentration from XPS |        |        |        |       |
|------------------------------------------------|-------------------------------|--------|--------|--------|-------|
|                                                | Cu (%)                        | Al (%) | Ga (%) | In (%) | O (%) |
| $\text{CuAl}_{0.5}\text{Ga}_{0.5}\text{O}_2$   | 26.1                          | 13.2   | 13.8   | 0.0    | 47.3  |
| $\text{CuAl}_{0.97}\text{In}_{0.03}\text{O}_2$ | 25.7                          | 24.3   | 0.0    | 1.1    | 48.5  |
| $\text{CuGa}_{0.9}\text{In}_{0.1}\text{O}_2$   | 21.7                          | 0.0    | 25.8   | 2.4    | 50.1  |
